# Supplementary material for: Dendrimer–tesaglitazar conjugate induces a phenotype shift of microglia and enhances β-amyloid phagocytosis
Source: Royal Society of Chemistry journal article supplement (doi:10.1039/d0nr05958g), 2020-12-15
Supplement: d0nr05958g1.pdf [file d0nr05958g1.pdf]

## Supplementary Information

### Dendrimer-Tesaglitazar Conjugate Induces a Phenotype Shift of Microglia and Enhances $\beta$ -amyloid Phagocytosis

*Louis DeRidder<sup>1,2</sup>, Anjali Sharma<sup>1</sup>, Kevin Liaw<sup>1,2</sup>, Rishi Sharma<sup>1</sup>, John John<sup>1,3</sup>, Sujatha Kannan<sup>4,5</sup>, Rangaramanujam M Kannan<sup>1,2,5\*</sup>*

#### Author Affiliations:

<sup>1</sup> Center for Nanomedicine, Department of Ophthalmology, Wilmer Eye Institute Johns Hopkins University School of Medicine, Baltimore, MD 21231, USA

<sup>2</sup> Department of Chemical and Biomolecular Engineering, Johns Hopkins University, Baltimore, MD, 21218, USA

<sup>3</sup> Department of Biomedical Engineering, Johns Hopkins University, Baltimore, 21218, USA

<sup>4</sup> Department of Anesthesiology and Critical Care Medicine, Johns Hopkins University School of Medicine, Baltimore, MD 21287, USA

<sup>5</sup> Hugo W. Moser Research Institute at Kennedy Krieger, Inc., Baltimore MD, 21205, USA

\* Corresponding author: E-mail: [krangar1@jhmi.edu](mailto:krangar1@jhmi.edu). Phone: +1-443-287-8634. Fax: +1-443-287-8635.

## Supplemental Figures:

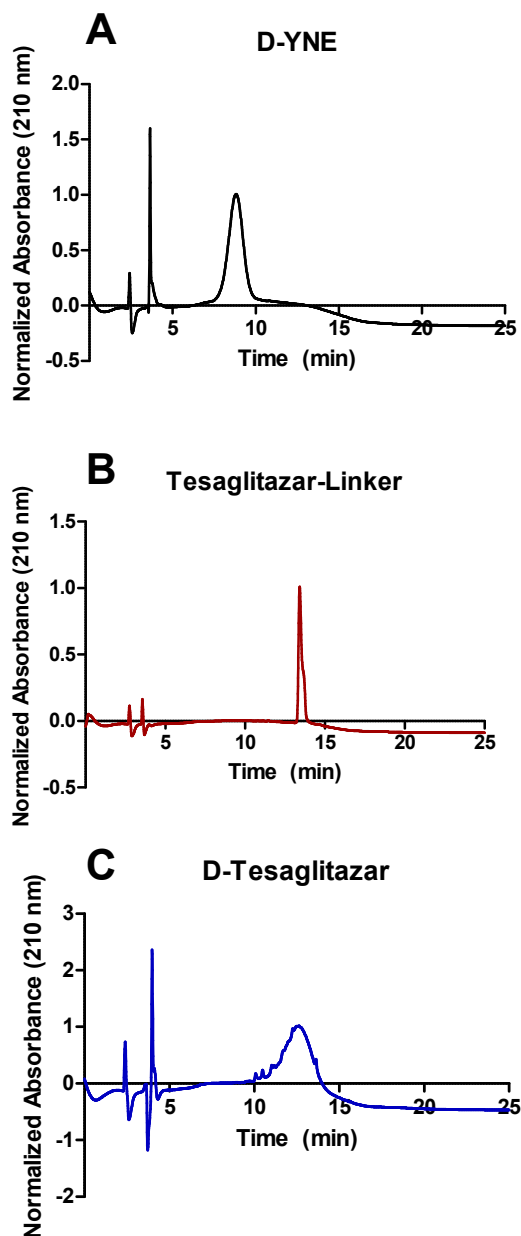

**Supplemental Figure 1. HPLC of (A) D-YNE, (B) Tesaglitazar-linker and (C) D-Tesaglitazar.** Purities were 99.8%, 99.2%, and 98.6%, respectively. The retention times were 8.9, 13.4, and 12.6 minutes, respectively.

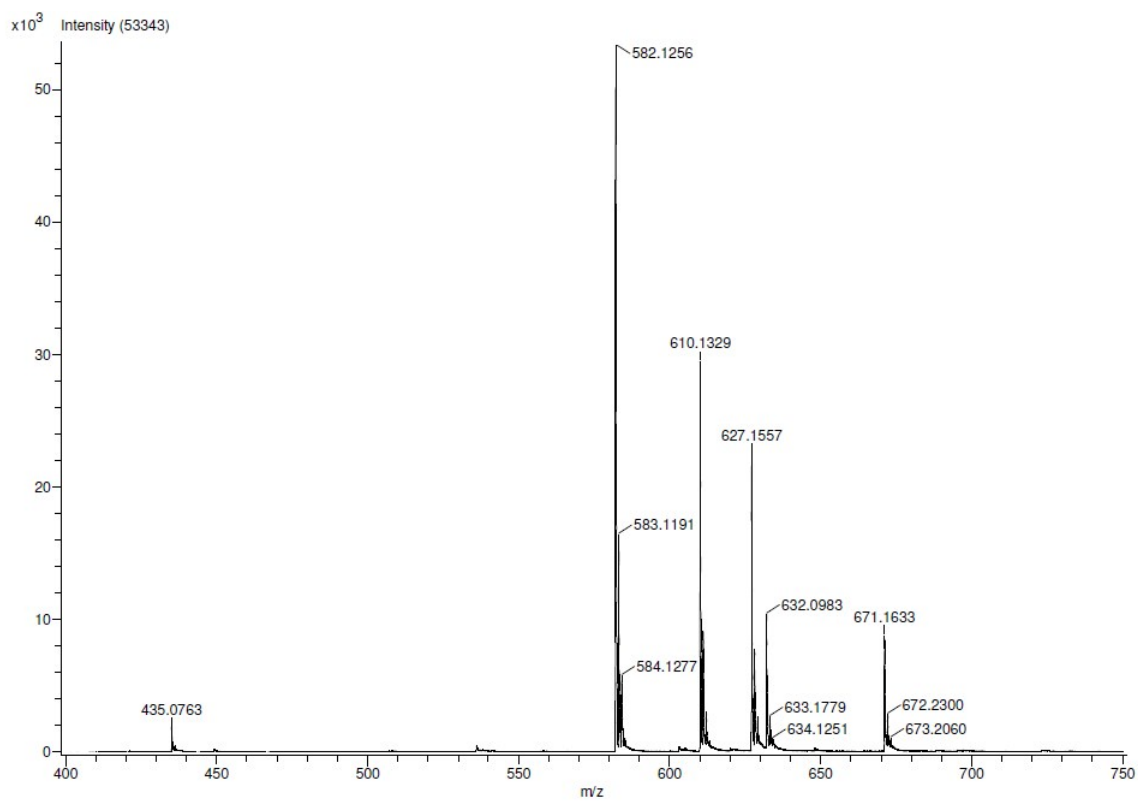

**Supplemental Figure 2. Mass spectrum of Tesa-TEG-azide (3).**

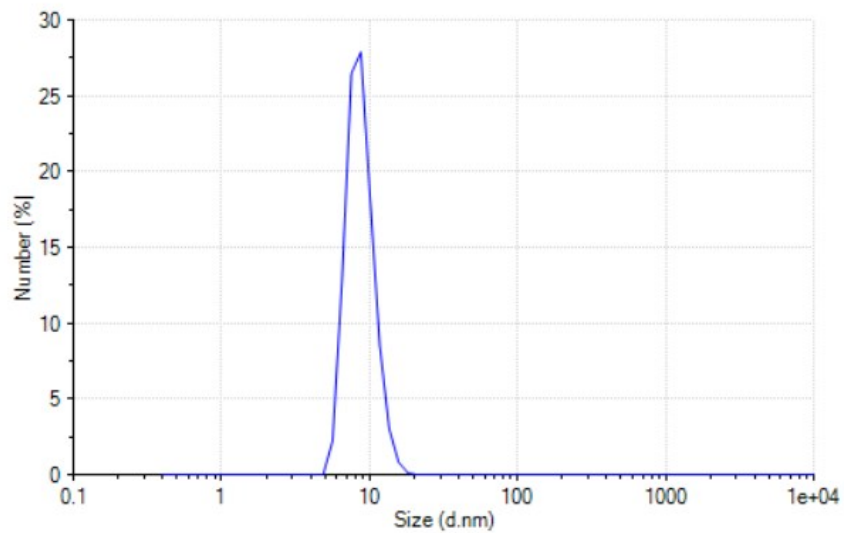

**Supplemental Figure 3. Dynamic Light Scattering (DLS) size distribution of D-Tesaglitazar.** A representative size distribution graph of D-Tesaglitazar dissolved in water at a concentration of 0.2 mg/ml.

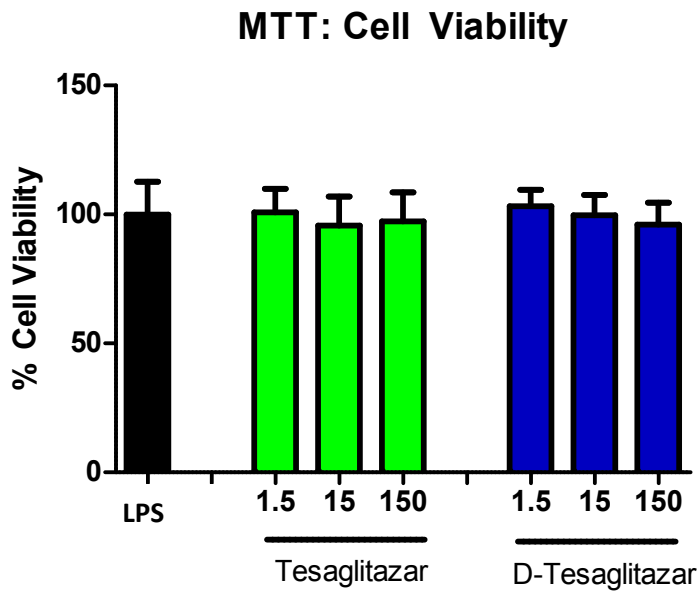

**Supplemental Figure 4. MTT Cytotoxicity Assay.** BV2 microglia cells were treated with LPS (100 ng/ml) for 3 hours, and then they were co-treated for 48 hours with LPS (100 ng/ml) and free tesaglitazar or D-Tesaglitazar at 1.5, 15, and 150 μM on a drug basis. LPS-only treated cells served as the control vehicle, as all drug solutions were made in 100 ng/ml LPS media. Then the MTT assay was run according to the manufacturer's protocol. Data is mean + SEM (N=3).

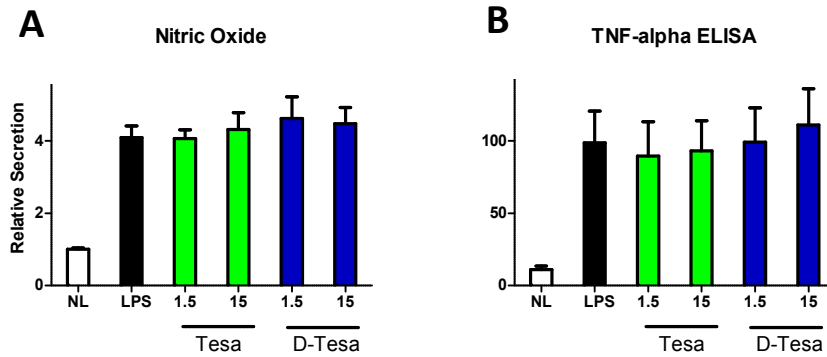

**Supplemental Figure 5. Low and medium doses of Tesa and D-Tesa do not significantly alter nitric oxide or TNF- $\alpha$  levels.** BV2 microglia cells were treated with LPS (100 ng/ml) for 3 hours, and then they were co-treated for 48 hours with LPS (100 ng/ml) and free tesaglitazar (Tesa) or D-Tesaglitazar (D-Tesa) at 1.5, 15, and 150  $\mu$ M on a drug basis. Cells that were neither treated with LPS nor drug (NL) and LPS-only treated cells (LPS) served as the controls. The supernatant was collected, (A) nitric oxide levels were measured with the Griess reagent, and (B) TNF- $\alpha$  levels were measured via ELISA. Data is mean + SEM (N=3).

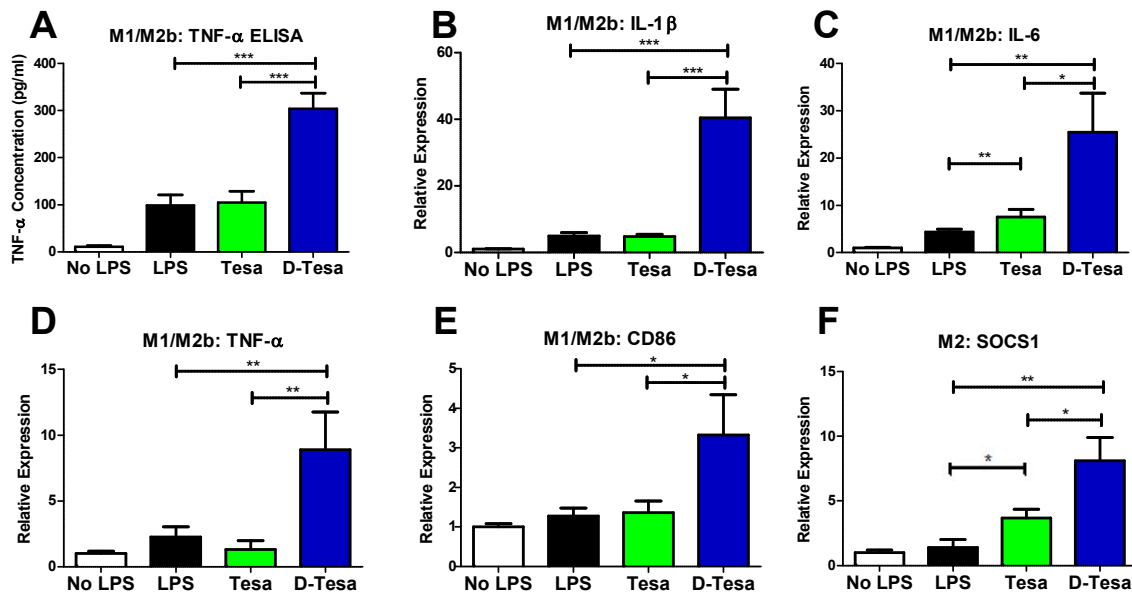

**Supplemental Figure 6. M1/M2b markers and M2 marker SOCS1 are upregulated with D-Tesaglitazar treatment.** BV2 microglia cells were treated with LPS (100 ng/ml) for 3 hours, and then they were co-treated for 48 hours with LPS (100 ng/ml) and free tesaglitazar (Tesa) or D-Tesaglitazar (D-Tesa) at 150  $\mu$ M on a drug basis. Cells that were neither treated with LPS nor drug (No LPS) and LPS-only treated cells (LPS) served as the controls. (A) Supernatants were collected, and TNF- $\alpha$  levels were measured via ELISA. (B-F) qRT-PCR analysis of: (B) IL-1 $\beta$ , (C) IL-6, (D) TNF- $\alpha$ , (E) CD86, and (F) SOCS1. All data is mean + SEM (N=3). \* $p$ <0.05, \*\* $p$ <0.01, \*\*\* $p$ <0.001 (Bonferroni corrected).
